# Supplementary material
Source: PubMed Central journal article supplement (PMC3532938)

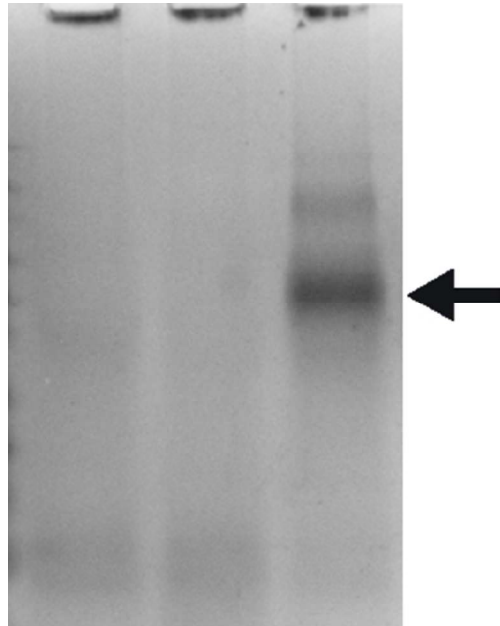

**1**      **2**      **3**

**1. Protamine**

**2. Protamine + G7-NH<sub>2</sub>**

**3. Protamine + G6.5-COOH**

## Supplemental Figure 1

34x65mm (300 x 300 DPI)

Supplement: NIHMS415282-supplement-2_si_002.pdf [file NIHMS415282-supplement-2_si_002.pdf]

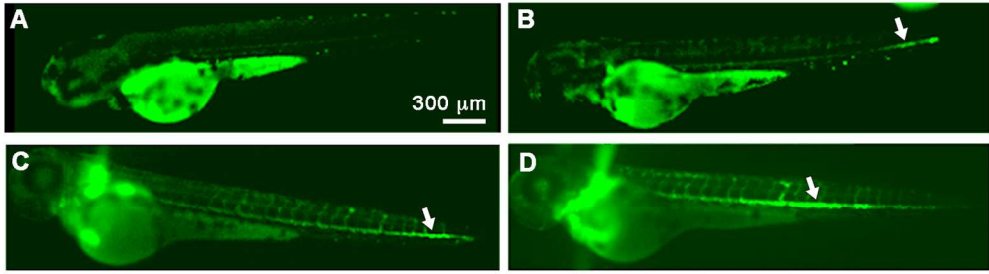

Supplemental Figure 2

139x44mm (300 x 300 DPI)

Supplement: NIHMS415282-supplement-3_si_003.pdf [file NIHMS415282-supplement-3_si_003.pdf]

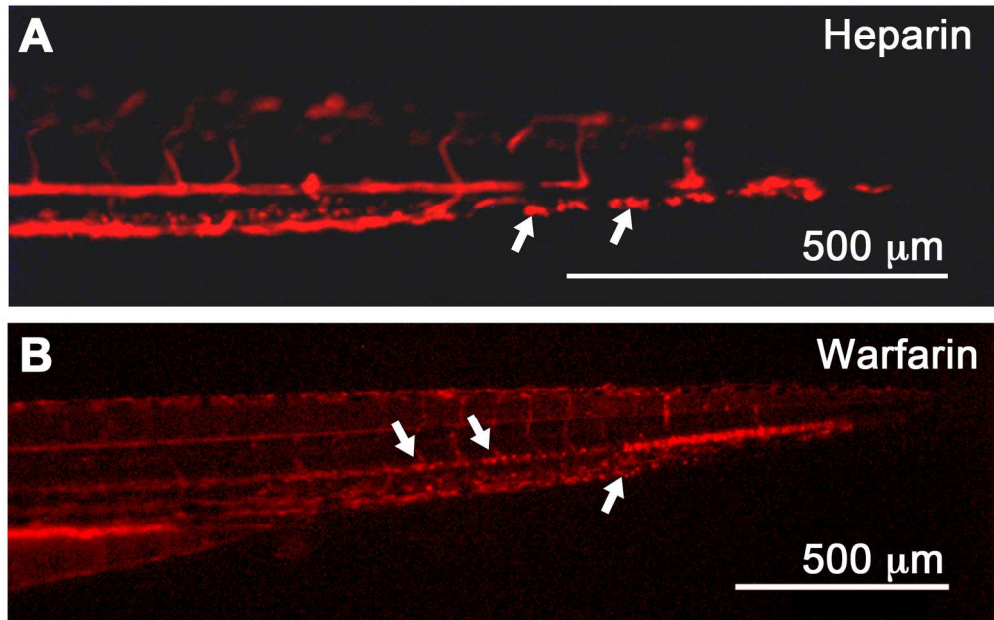

Supplemental Figure 3

76x56mm (705 x 705 DPI)

Supplement: NIHMS415282-supplement-4_si_004.pdf [file NIHMS415282-supplement-4_si_004.pdf]
